# Supplementary material for: Exposure to agricultural pesticides and wheezing among 5–12-year-old children in the Imperial Valley, CA, USA
Source: PubMed Central journal article supplement — Environ Epidemiol. 2024 Aug 19;8(5):e325. doi: 10.1097/EE9.0000000000000325 (PMC11335338; doi:10.1097/ee9.0000000000000325), 2024-08-19
Supplement: ee9-8-e325-s001.pdf [file ee9-8-e325-s001.pdf]

Table S1 Adjusted association for pesticide exposures (kg) within 400-m radius of a child's residence and wheezing symptoms at baseline in the AIRE cohort stratified by history of doctor diagnosed asthma and excluding exposure to environmental smoking

| Exposure                | N   | Wheezing Prevalence (95%CI) FULL |     | Wheezing Prevalence (95%CI) FULL |     | Wheezing Prevalence (95%CI) FULL |  |
|-------------------------|-----|----------------------------------|-----|----------------------------------|-----|----------------------------------|--|
|                         |     | ALL                              |     | Asthmatic                        |     | Non-asthmatic                    |  |
| <b>All</b>              |     |                                  |     |                                  |     |                                  |  |
| None                    | 179 | Ref.                             | 36  | Ref.                             | 143 | Ref.                             |  |
| Low (<67kg)             | 224 | 0.07 (-0.008-0.15)               | 57  | 0.11 (-0.11-0.34)                | 167 | 0.03 (-0.03-0.10)                |  |
| High (≥67kg)            | 217 | 0.11 (0.03-0.19)                 | 52  | 0.16 (-0.06-0.38)                | 165 | 0.05 (-0.10-0.12)                |  |
| <b>Sulfur</b>           |     |                                  |     |                                  |     |                                  |  |
| None                    | 373 | Ref.                             | 71  | Ref.                             | 302 | Ref.                             |  |
| Low (<80kg)             | 126 | 0.05(-0.04-0.13)                 | 36  | -0.03 (-0.24-0.17)               | 90  | -0.001 (-0.07-0.07)              |  |
| High (≥80kg)            | 121 | 0.14 (0.06-0.22)                 | 38  | 0.14 (-0.07-0.34)                | 83  | 0.06 (-0.01-0.12)                |  |
| <b>All minus Sulfur</b> |     |                                  |     |                                  |     |                                  |  |
| None                    | 182 | Ref.                             | 37  | Ref.                             | 145 | Ref.                             |  |
| Low(<34kg)              | 224 | 0.08 (-0.004-0.16)               | 48  | 0.08 (-0.14-0.29)                | 176 | 0.02 (-0.04-0.08)                |  |
| High (≥34)              | 214 | 0.10 (0.02-0.18)                 | 60  | 0.17 (-0.06-0.40)                | 154 | 0.06 (0.003-0.13)                |  |
| <b>Chlorpyrifos</b>     |     |                                  |     |                                  |     |                                  |  |
| None                    | 496 | Ref.                             | 113 | Ref.                             | 383 | Ref.                             |  |
| Low (<2kg)              | 60  | 0.07 (-0.03-0.18)                | 16  | 0.17 (-0.10-0.43)                | 44  | 0.03 (-0.05-0.12)                |  |
| High (≥2kg)             | 64  | 0.17 (0.06-0.28)                 | 16  | 0.24 (-0.02-0.50)                | 48  | 0.10 (0.009-0.19)                |  |
| <b>Glyphosate</b>       |     |                                  |     |                                  |     |                                  |  |
| None                    | 329 | Ref.                             | 69  | Ref.                             | 277 | Ref.                             |  |
| Low (<7kg)              | 138 | 0.05 (-0.03-0.13)                | 35  | -0.02 (-0.23-0.18)               | 111 | 0.04 (-0.03-0.10)                |  |
| High (≥7kg)             | 144 | 0.10 (0.02-0.18)                 | 39  | 0.18 (-0.01-0.38)                | 111 | 0.03 (-0.04-0.09)                |  |

Those exposed to environmental smoking were excluded

All models fully adjusted for sex, language of survey, health insurance, respondent education

Low and High categories split at the median for those with pesticide exposures greater than 0 within 400-m radius of the residence

None indicates no pesticide applications were applied within 400-m radius of the child's residence

Table S2 Minimally adjusted association for pesticide exposures (kg) within 400-m radius of a child's residence and wheezing symptoms at baseline in the AIRE cohort stratified by history of doctor diagnosed asthma and excluding those whose moms reported smoking during pregnancy

| Exposure         | N   | Wheezing Prevalence (95%CI) |     | Wheezing Prevalence (95%CI) |     | Wheezing Prevalence (95%CI) |
|------------------|-----|-----------------------------|-----|-----------------------------|-----|-----------------------------|
|                  |     | ALL                         |     | Asthmatic                   |     | Non-asthmatic               |
| All              |     |                             |     |                             |     |                             |
| None             | 179 | Ref.                        | 33  | Ref.                        | 145 | Ref.                        |
| Low              | 225 | 0.09 (0.05-0.20)            | 56  | 0.23 (0.01-0.44)            | 169 | 0.02 (-0.03-0.08)           |
| High             | 219 | 0.13 (0.02-0.17)            | 52  | 0.26 (0.05-0.47)            | 167 | 0.05 (-0.005-0.11)          |
| Sulfur           |     |                             |     |                             |     |                             |
| None             | 371 | Ref.                        | 68  | Ref.                        | 303 | Ref.                        |
| Low              | 125 | 0.06 (-0.02-0.14)           | 34  | 0.01 (-0.18-0.21)           | 91  | 0.004 (-0.06-0.07)          |
| High             | 126 | 0.14 (0.06-0.22)            | 39  | 0.21 (0.005-0.42)           | 87  | 0.06 (-0.008-0.12)          |
| All minus Sulfur |     |                             |     |                             |     |                             |
| None             | 180 | Ref.                        | 33  | Ref.                        | 147 |                             |
| Low              | 221 | 0.10 (0.03-0.18)            | 47  | 0.22 (0.008-0.43)           | 174 | 0.02 (-0.04-0.07)           |
| High             | 221 | 0.12 (0.04-0.19)            | 61  | 0.28 (0.06-0.51)            | 160 | 0.06 (0.005-0.12)           |
| Chlorpyrifos     |     |                             |     |                             |     |                             |
| None             | 499 | Ref.                        | 110 | Ref.                        | 389 |                             |
| Low              | 59  | 0.09 (-0.01-0.19)           | 15  | 0.19 (-0.07-0.45)           | 44  | 0.04 (-0.04-0.12)           |
| High             | 64  | 0.17 (0.06-0.27)            | 16  | 0.30 (0.04-0.57)            | 48  | 0.10 (0.02-0.18)            |
| Glyphosate       |     |                             |     |                             |     |                             |
| None             | 334 | Ref.                        | 69  | Ref.                        | 265 |                             |
| Low              | 141 | 0.04 (-0.04-0.12)           | 36  | 0.003 (-0.20-0.20)          | 105 | 0.03 (-0.03-0.09)           |
| High             | 144 | 0.10 (0.02-0.17)            | 36  | 0.22 (0.20-0.42)            | 108 | 0.02 (-0.04-0.08)           |

All models adjusted for sex and

Low and High categories split at the median for those with pesticide exposures greater than 0 within 400-m radius of the residence

None indicates no pesticide applications were applied within 400-m radius of the child's residence

Table S3 Fully adjusted association for pesticide exposures (kg) within 400-m radius of a child's residence and wheezing symptoms at baseline in the AIRE cohort stratified by history of doctor diagnosed asthma and excluding those whose moms reported smoking during pregnancy

| Exposure         | N   | Wheezing Prevalence (95%CI) |     | Wheezing Prevalence (95%CI) |     | Wheezing Prevalence (95%CI) |
|------------------|-----|-----------------------------|-----|-----------------------------|-----|-----------------------------|
|                  |     | ALL                         |     | Asthmatic                   |     | Non-asthmatic               |
| All              |     |                             |     |                             |     |                             |
| None             | 167 | Ref.                        | 31  | Ref.                        | 146 |                             |
| Low              | 215 | 0.08 (0.005-0.16)           | 54  | 0.20 (-0.02-0.43)           | 161 | 0.03 (-0.04-0.09)           |
| High             | 206 | 0.13 (0.05-0.20)            | 48  | 0.23 (0.007-0.46)           | 158 | 0.06 (-0.003-0.12)          |
| Sulfur           |     |                             |     |                             |     |                             |
| None             | 350 | Ref.                        | 63  | Ref.                        | 287 | Ref.                        |
| Low              | 120 | 0.07 (-0.02-0.15)           | 34  | 0.07 (-0.02-0.15)           | 86  | 0.007 (-0.06-0.07)          |
| High             | 118 | 0.14 (0.06-0.22)            | 36  | 0.14 (0.06-0.22)            | 82  | 0.07 (0.003-0.13)           |
| All minus Sulfur |     |                             |     |                             |     |                             |
| None             | 169 | Ref.                        | 31  | Ref.                        | 138 |                             |
| Low              | 212 | 0.10 (0.02-0.18)            | 45  | 0.19 (-0.03-0.41)           | 167 | 0.02 (-0.04-0.08)           |
| High             | 207 | 0.12 (0.04-0.20)            | 57  | 0.26 (0.02-0.50)            | 150 | 0.07 (0.005-0.13)           |
| Chlorpyrifos     |     |                             |     |                             |     |                             |
| None             | 470 | Ref.                        | 103 | Ref.                        | 367 |                             |
| Low              | 57  | 0.09 (-0.02-0.19)           | 15  | 0.19 (-0.08-0.46)           | 42  | 0.04 (-0.04-0.12)           |
| High             | 61  | 0.17 (0.06-0.28)            | 15  | 0.24 (-0.03-0.51)           | 46  | 0.11 (0.02-0.19)            |
| Glyphosate       |     |                             |     |                             |     |                             |
| None             | 314 | Ref.                        | 63  | Ref.                        | 251 |                             |
| Low              | 137 | 0.05 (-0.03-0.13)           | 36  | 0.02 (-0.19-0.22)           | 101 | 0.03 (-0.03-0.09)           |
| High             | 135 | 0.10 (0.02-0.18)            | 34  | 0.20 (-0.002-0.41)          | 101 | 0.02 (-0.04-0.09)           |

All models fully adjusted for sex, language of survey, health insurance, and respondent education

Low and High categories split at the median for those with pesticide exposures greater than 0 within 400-m radius of the residence

None indicates no pesticide applications were applied within 400-m radius of the child's residence

Table S4 Adjusted association for pesticide exposures (kg) within 400-m radius of a child's residence and wheezing symptoms at baseline in the AIRE cohort stratified by history of doctor diagnosed asthma and excluding exposure to environmental smoking and adjusting by length in residence

| Exposure                | N   | Wheezing Prevalence (95%CI) |           | Wheezing Prevalence (95%CI) |     |                      |
|-------------------------|-----|-----------------------------|-----------|-----------------------------|-----|----------------------|
|                         |     | ALL                         | Asthmatic | Non-asthmatic               |     |                      |
| <b>All</b>              |     |                             |           |                             |     |                      |
| None                    | 179 | Ref.                        | 36        | Ref.                        | 143 | Ref.                 |
| Low (<67kg)             | 224 | 0.07 (-0.008-0.15)          | 57        | 0.12 (-0.11-0.35)           | 167 | 0.03 (-0.03-0.10)    |
| High (≥67kg)            | 217 | 0.11 (0.03-0.19)            | 52        | 0.17 (-0.06-0.39)           | 165 | 0.05 (-0.10-0.12)    |
| <b>Sulfur</b>           |     |                             |           |                             |     |                      |
| None                    | 373 | Ref.                        | 71        | Ref.                        | 302 | Ref.                 |
| Low (<80kg)             | 126 | 0.05 (-0.04-0.13)           | 36        | -0.03 (-0.24-0.17)          | 90  | -0.0001 (-0.07-0.07) |
| High (≥80kg)            | 121 | 0.14 (0.06-0.22)            | 38        | 0.14 (-0.07-0.34)           | 83  | 0.06 (-0.01-0.12)    |
| <b>All minus Sulfur</b> |     |                             |           |                             |     |                      |
| None                    | 182 | Ref.                        | 37        | Ref.                        | 145 | Ref.                 |
| Low(<34kg)              | 224 | 0.08 (-0.004-0.16)          | 48        | 0.08 (-0.14-0.30)           | 176 | 0.02 (-0.04-0.09)    |
| High (≥34)              | 214 | 0.10 (0.02-0.18)            | 60        | 0.18 (-0.05-0.41)           | 154 | 0.06 (0.002-0.13)    |
| <b>Chlorpyrifos</b>     |     |                             |           |                             |     |                      |
| None                    | 496 | Ref.                        | 113       | Ref.                        | 383 | Ref.                 |
| Low (<2kg)              | 60  | 0.08 (-0.03-0.18)           | 16        | 0.17 (-0.10-0.43)           | 44  | 0.03 (-0.05-0.12)    |
| High (≥2kg)             | 64  | 0.17 (0.06-0.28)            | 16        | 0.24 (-0.02-0.51)           | 48  | 0.10 (0.008-0.19)    |
| <b>Glyphosate</b>       |     |                             |           |                             |     |                      |
| None                    | 329 | Ref.                        | 69        | Ref.                        | 277 | Ref.                 |
| Low (<7kg)              | 138 | 0.05 (-0.03-0.13)           | 35        | -0.02 (-0.23-0.18)          | 111 | 0.04 (-0.03-0.11)    |
| High (≥7kg)             | 144 | 0.10 (0.02-0.18)            | 39        | 0.18 (-0.01-0.38)           | 111 | 0.03 (-0.04-0.09)    |

Those exposed to environmental smoking were excluded

Fully adjusted for sex, language of survey, health insurance, responded education, and length of residence

Low and High categories split at the median for those with pesticide exposures greater than 0 within 400-m radius of the residence

None indicates no pesticide applications were applied within 400-m radius of the child's residence

Table S5 Adjusted association for pesticide exposures (kg) within 400-m radius of a child's residence and wheezing symptoms at baseline in the AIRE cohort stratified by history of doctor diagnosed asthma and excluding exposure to environmental smoking among those that NEVER MOVED N= 175

| Exposure                | N   | Wheezing Prevalence (95%CI) |    | Wheezing Prevalence (95%CI) |               |                      |
|-------------------------|-----|-----------------------------|----|-----------------------------|---------------|----------------------|
|                         |     | ALL                         |    | Asthmatic                   | Non-asthmatic |                      |
| <b>All</b>              |     |                             |    |                             |               |                      |
| None                    | 35  | Ref.                        | 8  | Ref.                        | 27            | Ref.                 |
| Low (<67kg)             | 60  | 0.05 (-0.03-0.13)           | 17 | 0.25 (-0.17-0.67)           | 43            | -0.007 (-0.14-0.13)  |
| High (≥67kg)            | 60  | 0.10 (0.02-0.18)            | 18 | 0.22 (-0.21-0.65)           | 42            | 0.12 (-0.01-0.25)    |
| <b>Sulfur</b>           |     |                             |    |                             |               |                      |
| None                    | 89  | Ref.                        | 20 | Ref.                        | 69            | Ref.                 |
| Low (<80kg)             | 29  | 0.09 (-0.07-0.26)           | 10 | 0.12 (-0.27-0.51)           | 19            | 0.02 (-0.11-0.15)    |
| High (≥80kg)            | 37  | 0.26 (0.08-0.44)            | 13 | 0.09 (-0.33-0.52)           | 24            | 0.24 (0.10-0.38)     |
| <b>All minus Sulfur</b> |     |                             |    |                             |               |                      |
| None                    | 35  | Ref.                        | 8  | Ref.                        | 27            | Ref.                 |
| Low(<34kg)              | 60  | 0.09 (-0.08-0.27)           | 15 | 0.19 (-0.22-0.60)           | 45            | 0.01 (-0.12-0.14)    |
| High (≥34)              | 60  | 0.15 (-0.03-0.32)           | 20 | 0.30 (-0.13-0.74)           | 40            | 0.10 (-0.03-0.23)    |
| <b>Chlorpyrifos</b>     |     |                             |    |                             |               |                      |
| None                    | 124 | Ref.                        | 35 | Ref.                        | 89            | Ref.                 |
| Low (<2kg)              | 13  | 0.08 (-0.13-0.28)           | 5  | 0.50 (-0.10-1.10)           | 8             | 0.10 (-0.04-0.25)    |
| High (≥2kg)             | 18  | 0.34 (0.11-0.58)            | 3  | 0.24 (-0.23-0.70)           | 15            | 0.32 (0.13-0.51)     |
| <b>Glyphosate</b>       |     |                             |    |                             |               |                      |
| None                    | 70  | Ref.                        | 19 | Ref.                        | 51            | Ref.                 |
| Low (<7kg)              | 42  | 0.01 (-0.15-0.17)           | 12 | 0.06 (-0.32-0.43)           | 30            | -0.0002 (-0.12-0.12) |
| High (≥7kg)             | 43  | 0.14 (-0.02-0.30)           | 12 | 0.33 (-0.03-0.69)           | 31            | 0.70 (-0.06-0.19)    |

Those exposed to environmental smoking were excluded

Fully adjusted for sex, language of survey, health insurance, and respondent education

Low and High categories split at the median for those with pesticide exposures greater than 0 within 400-m radius of the residence

None indicates no pesticide applications were applied within 400-m radius of the child's residence

Table S6 Adjusted association for pesticide exposures (kg) within 400-m radius of a child's residence and wheezing symptoms at baseline in the AIRE cohort stratified by history of doctor diagnosed asthma and excluding exposure to environmental smoking among those that MOVED N= 501

| Exposure                | N   | Wheezing Prevalence (95%CI) |    | Wheezing Prevalence (95%CI) |               |                     |
|-------------------------|-----|-----------------------------|----|-----------------------------|---------------|---------------------|
|                         |     | ALL                         |    | Asthmatic                   | Non-asthmatic |                     |
| <b>All</b>              |     |                             |    |                             |               |                     |
| None                    | 137 | Ref.                        | 23 | Ref.                        | 114           | Ref.                |
| Low (<67kg)             | 156 | 0.01 (-0.015-0.30)          | 29 | 0.09 (-0.19-0.37)           | 117           | 0.04 (-0.03-0.11)   |
| High (≥67kg)            | 146 | 0.14 (-0.02-0.30)           | 30 | 0.16 (-0.11-0.44)           | 116           | 0.04 (-0.03- 0.11)  |
| <b>Sulfur</b>           |     |                             |    |                             |               |                     |
| None                    | 268 | Ref.                        | 44 | Ref.                        | 224           | Ref.                |
| Low (<80kg)             | 94  | 0.04 (-0.06-0.14)           | 26 | -0.08 (-0.34-0.18)          | 68            | 0.005 (-0.08- 0.09) |
| High (≥80kg)            | 77  | 0.10 (0.01-0.20)            | 22 | 0.15 (-0.10-0.39)           | 55            | 0.008 (-0.07-0.08)  |
| <b>All minus Sulfur</b> |     |                             |    |                             |               |                     |
| None                    | 139 | Ref.                        | 24 | Ref.                        | 115           | Ref.                |
| Low(<34kg)              | 157 | 0.07 (-0.02-0.17)           | 32 | 0.06 (-0.20-0.33)           | 125           | 0.02 (-0.05-0.10)   |
| High (≥34)              | 143 | 0.09 (-0.003-0.18)          | 36 | 0.15 (-0.13-0.44)           | 107           | 0.05 (-0.02-0.13)   |
| <b>Chlorpyrifos</b>     |     |                             |    |                             |               |                     |
| None                    | 351 | Ref.                        | 69 | Ref.                        | 282           | Ref.                |
| Low (<2kg)              | 45  | 0.08 (-0.05-0.20)           | 11 | 0.10 (-0.20-0.41)           | 34            | 0.007 (-0.09-0.11)  |
| High (≥2kg)             | 43  | 0.12 (-0.003-0.24)          | 12 | 0.26 (-0.06-0.59)           | 31            | 0.04 (-0.06-0.14)   |
| <b>Glyphosate</b>       |     |                             |    |                             |               |                     |
| None                    | 248 | Ref.                        | 44 | Ref.                        | 204           | Ref.                |
| Low (<7kg)              | 98  | 0.06 (-0.03-0.16)           | 26 | -0.05 (-0.03-0.21)          | 72            | 0.05 (-0.02-0.13)   |
| High (≥7kg)             | 91  | 0.08 (-0.009-0.18)          | 22 | 0.11 (-0.14-0.35)           | 69            | 0.009 (-0.07-0.08)  |

Those exposed to environmental smoking were excluded

Fully adjusted for sex, language of survey, health insurance, and respondent education

Low and High categories split at the median for those with pesticide exposures greater than 0 within 400-m radius of the residence

None indicates no pesticide applications were applied within 400-m radius of the child's residence

Table S7 Top pesticides applied in Imperial County, CA, USA 2016-2020.

| Active Ingredient   | Total Sum (kg) |
|---------------------|----------------|
| SULFUR              | 3675988        |
| 1,3-DICHLOROPROPENE | 1075487        |
| PENDIMETHALIN       | 704381         |
| GLYPHOSATE          | 680440         |
| CHLORPYRIFOS        | 343866         |
| BENSULIDE           | 337528         |
| TRIFLURALIN         | 319379         |
| MINERAL OIL         | 228666         |
| KAOLIN              | 139606         |
| EPTC                | 106711         |
| IMIDACLOPRID        | 101825         |

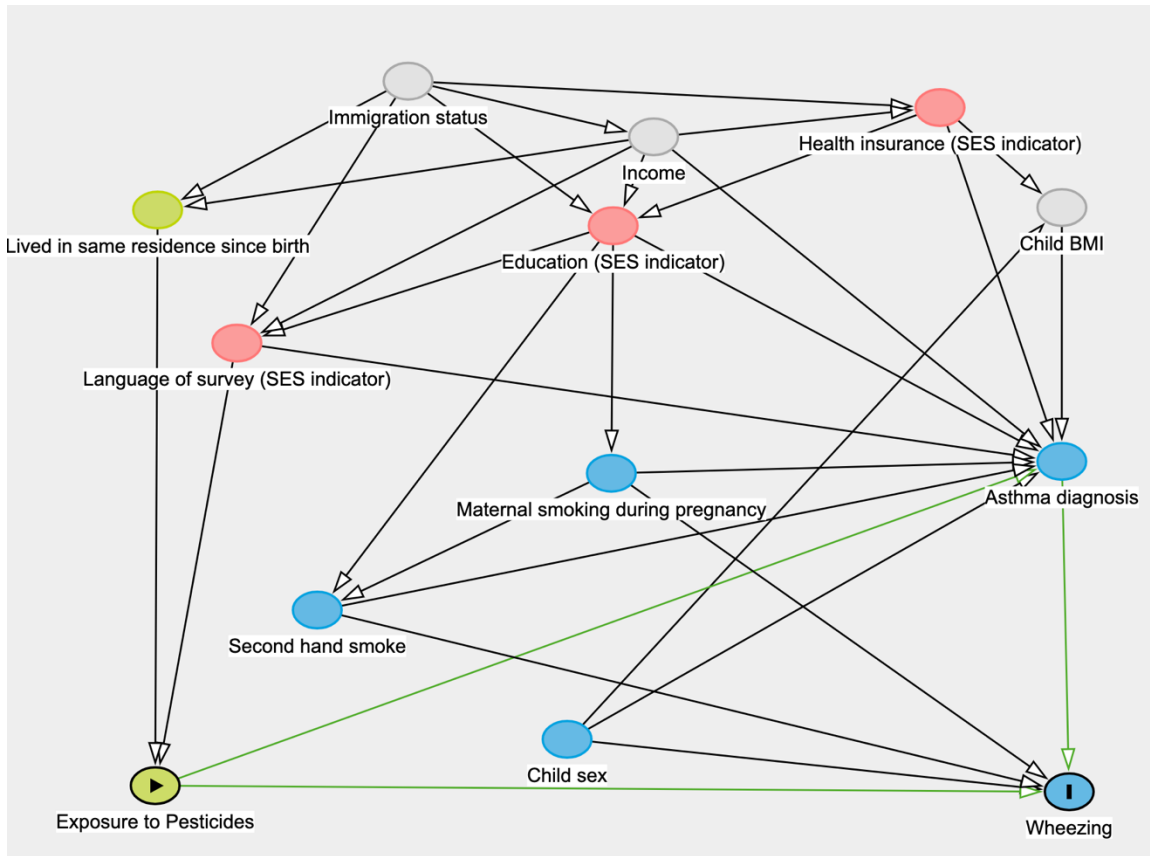

**Figure S1** Directed acyclic graph for estimating the direct effect of pesticide exposure on childhood wheezing. **Parameters in red are potential confounding factors**, parameters in blue are ancestors of the outcome only (i.e., cause of the outcome but not of the exposure) and parameters in grey are unmeasured variables. Green line: causal path. According to the DAG, the minimal sufficient adjustment for estimating the total effect of pesticide exposure on childhood wheezing is language of survey and lived in the same residence since birth. As we are only focusing on short term exposures of pesticides (12 months) we opted to have the minimal model be language of survey, and child sex as it is a strong predictor for wheezing. Living in the same residence since birth is a proxy for cumulative exposure and thus excluding does not change the 12-month exposure estimates used in analyses. In full models we further adjusted by education and health insurance both indicators of socioeconomic status.
